# Supplementary material for: Expressing accessory proteins in cellulolytic Yarrowia lipolytica to improve the conversion yield of recalcitrant cellulose
Source: PubMed Central journal article supplement (PMC5724336; doi:10.1186/s13068-017-0990-y), 2017-12-11
Supplement: 13068_2017_990_MOESM2_ESM.pdf [file 13068_2017_990_MOESM2_ESM.pdf]

## Nucleotide sequence of codon-optimized SWO1

Note that this nucleotide sequence was codon-optimized based on the codon bias of *Y. lipolytica* and is started with prepro sequence of Lip2 of *Y. lipolytica* (underlined)

>*TrSWO1*

ATGAAGCTTTCCACCATCCTTTTCACAGCCTGCGCTACCCTGGCTGCCGCCCTCCCTTCCCCATCACTC  
CTTCTGAGGCCCGCAGTTCTCCAGAAGCGAGCCCAGCAGAACTGTGCCGCTCTCTTTGGACAGTGTGGC  
GGAATCGGTTGGTCGGGTACTACCTGTTGCGTTGCCGGTGCCCAGTGCTCCTTCGTGAACGACTGGTAC  
TCGCAGTGTCTCGCTTCCACCGGAGGTAACCCTCCTAACGGTACCACTTCCCTCTTCGCTGGTGTCCCGA  
ACCTCCTCTGCTTCGTCCTCTGTTGGCTCGTCCTCTCCCGGAGGCAACTCTCCTACTGGTTCTGCCTCG  
ACCTACACCACTACCGACACTGCCACCGTTGCTCCCCACTCCCAGTCTCCCTACCCTTCCATCGCCGCT  
TCGTCCTGTGGATCTTGGACCCTCGTCGACAACGTGTGCTGTCCCTTCTTACTGCGCTAACGACGATAACC  
TCGGAGTCCTGCTCTGGCTGTGGTACCTGCACTACCCCCCTTCTGCCGACTGTAAGTCGGGTACCATG  
TACCCCGAGGTTACCATGTCTCTTCGAACGAGTCCTGGCACTACTCGCGATCCACTCATTTCGGACTG  
ACCTCTGGTGGAGCTTGTGGATTTGGCCTGTACGGACTCTGCACCAAGGGCTCCGTCACTGCCTCTTG  
GACCGACCCCATGCTCGGAGCCACTTGTGATGCTTTCTGCACCGCCTACCCCTGCTCTGCAAGGACCC  
TACCGGTAATAACCCTGCGAGGAACTTCGCCGCTCCCAACGGCGACTACTACACCAGTTTTGGTCCCTC  
TCTGCCTGGTGCCCTCGATAACTACCTGTCCTGTGGAGAGTGCATCGAGCTCATTGAGACTAAGCCCGA  
CGGTACCGATTACGCTGTTGGCGAGGCCGTTACACTGACCCCATCACCTGGAGATTGTCGATTCTTG  
CCCTTGTCTGCTAACTCGAAGTGGTGCTGTGGTCCCTGGAGCTGACCACTGTGGAGAGATTGATTTCAA  
GTACGGTTGCCCCCTGCCTGCTGACTCCATCCATCTGGACCTCTCTGATATTGCCATGGGACGACTCCA  
GGGCAACGGTTCCTGACTAACGGCGTCATCCCCACCCGATACCGACGAGTCCAGTGCCCTAAGGTCG  
GCAACGCTTACATTTGGCTCCGAAACGGCGGTGGACCTACTACTTTGCCCTGACTGCTGTTAACACCA  
ACGGACCTGGCTCTGTCACCAAGATCGAGATTAAGGGCGCTGACACCGATAACTGGGTGGCCCTGGTT  
CACGACCCCAACTACACCTCGTCCCGACCTCAGGAGCGATACGGTTCCTGGGTCATCCCCAGGGTTC  
TGGACCTTCAACCTCCCTGTGGGAATTCGACTGACTTCCCCACCGGCGAGCAGATCGTGAACGAGC  
AGGCCATTAAGACTTTTACCCTCCTGCCACCGGAGACCCCAACTTTTACTACATTGACATCGGGCTCC  
AGTTTTCCAGAACTAA
